# Supplementary material for: Genome-Wide Analysis of the Lysine Biosynthesis Pathway Network during Maize Seed Development
Source: PLoS One. 2016 Feb 1;11(2):e0148287. doi: 10.1371/journal.pone.0148287 (PMC4734768; doi:10.1371/journal.pone.0148287)
Supplement: S3 Table — (XLSX) [file pone.0148287.s011.xlsx]

## Sheet: LBPGs summary
Table for the summary of the modules and coexpression gene number of Lysine biosynthesis pathway genes
Gene	Module	Module gene
AK1	blue	4248
DHDPS1
LysA2
AK2	cyan	2250
DapB1
Ak3	purple	2204
ASD	darkred	781
DHDPS2
DapF1
DapB2	steelblue	227
LL-DAP	brown	3769
DapF2	pink	2139
LysA1	darkturquoise	276
Total gene was the all genes in the eight modules. Coexpression gene was the genes coexpression with LBPGs

## Sheet: Coexpression
Table for Coexpression network of maize seed expression genes
Gene	Module
GRMZM2G024563	lightgreen
GRMZM5G809265	brown
GRMZM2G005155	cyan
GRMZM2G111923	darkturquoise
GRMZM2G140016	blue
GRMZM2G028366	midnightblue
GRMZM2G004888	brown
GRMZM2G109821	purple
GRMZM2G488458	blue
GRMZM2G119782	purple
GRMZM2G117633	lightgreen
GRMZM2G091487	purple
GRMZM2G151873	purple
GRMZM5G819212	brown
GRMZM2G174797	pink
GRMZM2G108273	grey
GRMZM2G077596	pink
GRMZM2G314386	skyblue
GRMZM2G112176	purple
GRMZM2G563732	brown
GRMZM2G177828	lightgreen
GRMZM2G133885	cyan
GRMZM2G012391	brown
GRMZM2G126239	purple
GRMZM2G440614	cyan
GRMZM2G034575	brown
GRMZM2G090300	blue
GRMZM2G037064	blue
GRMZM2G124276	cyan
GRMZM2G125482	white
GRMZM2G046676	cyan
GRMZM2G375999	skyblue3
GRMZM2G014154	blue
AC207260.3_FG003	blue
GRMZM2G039650	blue
GRMZM2G029912	purple
GRMZM2G416019	blue
GRMZM2G101179	brown
GRMZM2G120302	skyblue
GRMZM2G113473	darkturquoise
GRMZM2G323936	cyan
GRMZM5G889776	pink
GRMZM2G040079	blue
GRMZM2G048616	brown
GRMZM2G031568	pink
GRMZM2G018806	white
GRMZM2G084762	blue
GRMZM2G101689	blue
GRMZM2G098527	purple
GRMZM2G057247	yellowgreen
GRMZM2G016066	midnightblue
GRMZM2G040481	purple
GRMZM2G086906	darkred
GRMZM2G077131	blue
GRMZM2G142207	darkgrey
GRMZM5G814465	blue
GRMZM2G469873	pink
GRMZM2G131026	pink
GRMZM2G102657	brown
GRMZM2G072041	brown
GRMZM2G340282	brown
GRMZM5G889299	grey
GRMZM2G174343	purple
GRMZM2G064328	blue
GRMZM2G087413	brown
GRMZM2G156069	midnightblue
GRMZM2G057514	paleturquoise
GRMZM2G397836	blue
GRMZM2G166671	pink
GRMZM5G892094	blue
GRMZM2G319573	brown
GRMZM2G173700	cyan
GRMZM2G448710	darkorange
GRMZM2G019356	cyan
GRMZM2G018062	paleturquoise
GRMZM2G009653	blue
GRMZM2G053742	paleturquoise
GRMZM2G447691	cyan
GRMZM2G044343	blue
GRMZM2G039592	blue
GRMZM2G176662	blue
GRMZM2G003909	darkolivegreen
GRMZM2G052277	midnightblue
GRMZM2G048928	blue
GRMZM2G363460	purple
GRMZM2G067080	darkred
GRMZM5G862565	lightgreen
GRMZM2G409934	blue
GRMZM2G045236	lightgreen
GRMZM2G061704	pink
GRMZM2G173923	brown
GRMZM2G037823	darkred
GRMZM2G401026	pink
GRMZM2G403562	lightgreen
GRMZM2G155849	brown
GRMZM2G085827	cyan
GRMZM2G050647	blue
GRMZM2G043887	midnightblue
GRMZM5G894619	cyan
GRMZM2G328060	cyan
GRMZM2G165836	cyan
GRMZM2G366411	purple
GRMZM5G856071	yellowgreen
GRMZM2G126261	pink
GRMZM2G178955	lightgreen
AC217401.3_FG002	pink
GRMZM2G448883	cyan
GRMZM2G095643	darkgrey
GRMZM5G896568	darkturquoise
GRMZM2G104456	blue
GRMZM2G038032	darkred
GRMZM2G472052	lightgreen
GRMZM2G176063	darkgrey
GRMZM2G159369	cyan
GRMZM2G127050	blue
GRMZM2G099337	brown
GRMZM2G000271	purple
GRMZM2G078118	blue
GRMZM5G869403	cyan
GRMZM2G037627	purple
GRMZM2G056513	orange
GRMZM2G310155	blue
AC177908.3_FG002	blue
GRMZM2G097802	cyan
GRMZM2G132958	brown
GRMZM2G180699	blue
GRMZM2G089421	steelblue
GRMZM2G169782	white
GRMZM2G317262	paleturquoise
GRMZM2G135904	brown
GRMZM2G055450	pink
GRMZM2G091819	brown
GRMZM2G319357	pink
GRMZM2G090715	cyan
GRMZM2G057602	blue
GRMZM2G147869	brown
GRMZM2G148180	lightyellow
GRMZM2G041613	blue
GRMZM2G064371	blue
GRMZM2G164912	lightgreen
GRMZM2G108149	brown
AC191009.3_FG004	lightgreen
GRMZM2G086066	brown
GRMZM2G144841	brown
GRMZM2G139952	darkred
GRMZM2G139834	brown
GRMZM2G093344	cyan
AC233966.1_FG001	brown
GRMZM2G124593	cyan
GRMZM2G026490	grey
GRMZM2G099745	cyan
GRMZM2G126190	blue
GRMZM2G160460	purple
GRMZM2G031586	steelblue
GRMZM2G181158	brown
GRMZM2G180458	lightgreen
GRMZM2G007300	purple
GRMZM2G138230	brown
GRMZM2G465226	darkmagenta
GRMZM2G126447	blue
GRMZM2G075956	brown
GRMZM2G004583	blue
GRMZM2G041633	blue
GRMZM2G005909	blue
GRMZM2G312838	darkred
GRMZM2G455115	blue
GRMZM2G008657	pink
GRMZM2G045049	purple
GRMZM2G166230	blue
GRMZM2G137558	brown
GRMZM2G073860	brown
GRMZM2G009717	cyan
GRMZM2G095724	cyan
GRMZM2G049141	blue
GRMZM2G164489	blue
AC200057.4_FG007	blue
GRMZM2G472473	midnightblue
GRMZM2G170805	pink
GRMZM2G090744	cyan
GRMZM2G000719	lightgreen
GRMZM2G168119	brown
GRMZM2G142063	purple
GRMZM5G817173	grey
GRMZM2G036534	purple
GRMZM2G132994	purple
GRMZM2G063550	paleturquoise
GRMZM2G037177	lightyellow
GRMZM2G054115	cyan
GRMZM2G377079	purple
GRMZM2G137421	brown
GRMZM2G033413	purple
GRMZM2G050939	blue
GRMZM2G179693	lightgreen
GRMZM2G123544	purple
GRMZM2G013908	blue
GRMZM2G438673	blue
GRMZM2G430646	purple
GRMZM2G422670	blue
GRMZM2G139878	midnightblue
GRMZM2G163473	blue
GRMZM2G171650	lightgreen
GRMZM2G059039	darkred
GRMZM2G093139	cyan
GRMZM5G881902	darkolivegreen
GRMZM5G800734	lightgreen
GRMZM2G034623	lightgreen
GRMZM2G371313	blue
GRMZM2G031435	darkturquoise
GRMZM2G009223	cyan
GRMZM2G319104	brown
GRMZM2G024260	midnightblue
GRMZM2G170934	brown
GRMZM5G822352	lightgreen
GRMZM2G064590	lightgreen
GRMZM2G088737	pink
AC191264.3_FG002	brown
GRMZM2G041493	white
GRMZM2G000510	brown
AC209784.3_FG007	cyan
GRMZM2G105307	lightyellow
GRMZM2G017145	purple
GRMZM2G016232	pink
GRMZM2G477885	orange
GRMZM2G470499	cyan
GRMZM2G040828	purple
GRMZM2G102347	pink
GRMZM2G086430	brown
AC217293.3_FG007	cyan
GRMZM2G429972	brown
GRMZM2G161302	darkred
GRMZM2G074466	blue
GRMZM2G177561	lightyellow
GRMZM2G006428	brown
GRMZM2G029632	blue
GRMZM2G158489	blue
GRMZM2G140917	blue
GRMZM2G150014	pink
GRMZM2G016640	blue
GRMZM2G076029	brown
GRMZM5G863596	blue
GRMZM5G884270	blue
GRMZM2G177391	orange
GRMZM2G113396	blue
GRMZM2G447987	purple
GRMZM2G136887	blue
GRMZM2G348846	brown
GRMZM2G089193	pink
GRMZM2G118534	purple
GRMZM2G090087	blue
GRMZM2G352618	lightyellow
GRMZM2G351990	cyan
GRMZM2G328795	white
GRMZM2G004140	blue
GRMZM2G318633	blue
GRMZM2G078926	brown
GRMZM2G045294	cyan
GRMZM2G365035	blue
GRMZM2G008106	blue
GRMZM2G012213	skyblue
GRMZM5G896916	blue
GRMZM2G176394	pink
GRMZM5G819919	brown
GRMZM2G028700	brown
AC193500.3_FG003	darkmagenta
GRMZM2G444029	cyan
GRMZM2G311036	purple
GRMZM2G131597	lightgreen
GRMZM2G103672	darkgrey
GRMZM2G106622	pink
GRMZM2G351469	orange
GRMZM2G469898	cyan
GRMZM5G803318	blue
GRMZM2G062777	blue
GRMZM5G879749	midnightblue
GRMZM2G121221	blue
GRMZM2G366392	purple
GRMZM5G872499	sienna3
GRMZM5G866918	blue
GRMZM2G101818	pink
GRMZM2G122447	grey
GRMZM2G008341	blue
GRMZM2G412234	brown
GRMZM2G445634	cyan
AC211474.3_FG006	grey
GRMZM2G073044	pink
GRMZM2G061419	cyan
GRMZM2G377341	brown
GRMZM2G070780	grey
GRMZM5G844562	pink
GRMZM2G122362	brown
GRMZM2G044382	blue
GRMZM2G015989	darkred
GRMZM2G170969	pink
GRMZM2G333916	pink
GRMZM2G082448	cyan
GRMZM2G181227	brown
GRMZM2G117405	white
GRMZM2G306376	brown
GRMZM2G010105	blue
GRMZM2G136803	purple
GRMZM2G473367	purple
GRMZM2G163283	white
GRMZM2G030494	midnightblue
GRMZM2G026391	lightgreen
GRMZM5G808811	steelblue
GRMZM2G009575	brown
GRMZM2G093858	purple
GRMZM2G161335	brown
GRMZM2G086587	purple
GRMZM2G324248	pink
AC234575.1_FG003	paleturquoise
GRMZM2G061969	lightgreen
GRMZM2G018689	skyblue
GRMZM2G149428	midnightblue
GRMZM2G701109	purple
GRMZM2G138920	brown
GRMZM2G098884	blue
GRMZM2G010433	brown
GRMZM2G067183	blue
GRMZM2G703415	brown
GRMZM2G467169	brown
GRMZM2G043348	grey
GRMZM2G106680	blue
GRMZM2G047867	brown
GRMZM2G168330	steelblue
GRMZM2G010065	skyblue
GRMZM2G177915	brown
GRMZM2G405090	cyan
AC213099.3_FG002	skyblue
GRMZM2G080263	saddlebrown
GRMZM2G330453	purple
GRMZM2G131683	purple
GRMZM2G133512	cyan
GRMZM2G019284	pink
GRMZM2G158462	lightyellow
GRMZM5G801076	pink
GRMZM2G348909	cyan
GRMZM2G066749	brown
AC166636.1_FG008	midnightblue
GRMZM2G166348	blue
GRMZM5G866099	blue
AC203847.3_FG009	saddlebrown
GRMZM2G010136	cyan
GRMZM2G107089	pink
GRMZM2G060762	lightgreen
GRMZM2G079365	brown
GRMZM2G410963	brown
GRMZM2G096184	pink
GRMZM2G337749	blue
GRMZM2G421655	cyan
GRMZM2G069061	blue
GRMZM2G141216	brown
GRMZM2G100955	brown
GRMZM5G875655	midnightblue
GRMZM2G029356	pink
GRMZM2G022841	brown
GRMZM2G026780	blue
GRMZM5G813302	brown
GRMZM5G891944	darkgrey
GRMZM2G113202	brown
GRMZM2G377161	brown
GRMZM2G014276	darkturquoise
GRMZM2G044576	sienna3
GRMZM5G825515	pink
GRMZM2G145775	midnightblue
GRMZM2G138624	lightgreen
AC235534.1_FG007	purple
GRMZM2G109429	blue
GRMZM2G168920	midnightblue
GRMZM2G159768	purple
AC212112.4_FG002	lightyellow
GRMZM2G063375	lightgreen
GRMZM2G030144	darkturquoise
GRMZM2G138029	blue
GRMZM2G098015	midnightblue
GRMZM5G884242	pink
AC234528.1_FG005	darkolivegreen
GRMZM2G173424	pink
GRMZM2G023982	lightgreen
GRMZM2G003992	lightgreen
GRMZM2G128421	brown
GRMZM2G177384	purple
GRMZM2G498656	brown
GRMZM2G043584	cyan
GRMZM2G041238	darkorange
GRMZM2G028041	brown
GRMZM2G087850	blue
GRMZM2G045699	lightgreen
GRMZM2G069316	cyan
GRMZM2G365423	lightgreen
GRMZM2G469523	blue
GRMZM2G118014	blue
GRMZM2G082260	brown
GRMZM2G111113	sienna3
GRMZM2G092152	pink
GRMZM2G023312	grey
GRMZM2G477879	blue
GRMZM2G020766	purple
GRMZM5G830329	white
GRMZM2G124644	cyan
GRMZM2G348551	brown
GRMZM2G125138	blue
GRMZM2G704349	brown
GRMZM2G063737	pink
GRMZM2G039263	darkturquoise
GRMZM2G332821	purple
GRMZM2G073498	pink
GRMZM2G066578	midnightblue
GRMZM2G159481	purple
GRMZM2G132000	pink
GRMZM2G374881	darkred
GRMZM2G018417	brown
GRMZM2G022987	purple
GRMZM2G080652	pink
GRMZM2G037350	blue
GRMZM2G034471	purple
GRMZM2G146475	cyan
GRMZM2G075683	pink
GRMZM2G465091	darkgrey
GRMZM2G000593	blue
GRMZM2G104538	blue
GRMZM2G342515	pink
GRMZM2G138077	darkred
GRMZM2G144873	purple
GRMZM2G419994	purple
GRMZM2G100881	pink
GRMZM2G001033	blue
GRMZM2G145556	lightgreen
GRMZM2G103266	blue
GRMZM2G128146	pink
GRMZM2G052100	purple
GRMZM2G096051	skyblue
GRMZM2G176495	skyblue3
GRMZM2G159678	cyan
GRMZM2G104649	cyan
GRMZM2G399136	paleturquoise
GRMZM2G123411	midnightblue
GRMZM2G091717	blue
GRMZM5G866989	purple
GRMZM2G450424	darkred
GRMZM2G078441	pink
GRMZM2G046681	lightgreen
GRMZM2G027344	brown
GRMZM2G104999	purple
GRMZM2G028730	blue
GRMZM2G152908	darkolivegreen
GRMZM2G176841	grey
GRMZM2G455587	brown
GRMZM2G097736	yellowgreen
GRMZM2G016774	lightgreen
GRMZM2G703490	lightgreen
GRMZM2G075974	purple
GRMZM2G071620	pink
GRMZM2G443340	darkred
GRMZM2G073584	lightgreen
GRMZM2G006474	brown
GRMZM2G524711	brown
GRMZM5G874903	brown
GRMZM2G004172	darkred
GRMZM2G031479	brown
GRMZM2G067373	brown
GRMZM2G461447	purple
GRMZM2G013342	midnightblue
GRMZM2G173684	midnightblue
GRMZM2G110983	cyan
GRMZM2G495102	pink
GRMZM2G052991	midnightblue
GRMZM2G157177	cyan
GRMZM2G382632	purple
GRMZM2G028945	darkturquoise
GRMZM2G474531	brown
GRMZM2G074821	blue
GRMZM2G107945	blue
AC194425.3_FG005	purple
GRMZM5G849959	blue
GRMZM2G053600	brown
GRMZM2G159389	blue
GRMZM2G340065	purple
GRMZM2G085246	purple
GRMZM2G002135	blue
AC233788.2_FG002	cyan
GRMZM2G144581	darkred
GRMZM5G800925	blue
GRMZM2G170567	pink
GRMZM5G836378	lightgreen
GRMZM5G886709	lightgreen
GRMZM2G058498	darkturquoise
GRMZM2G152655	saddlebrown
GRMZM2G064775	blue
GRMZM2G099130	cyan
GRMZM2G433433	midnightblue
GRMZM2G063216	purple
GRMZM5G865112	blue
GRMZM5G802392	orange
GRMZM2G085547	blue
GRMZM2G002297	lightgreen
GRMZM2G377686	blue
GRMZM2G434317	blue
GRMZM2G059634	darkgrey
AC205730.3_FG002	brown
GRMZM2G449941	skyblue3
GRMZM2G179120	blue
GRMZM5G885628	blue
GRMZM2G057296	cyan
GRMZM2G012724	blue
GRMZM2G426802	lightgreen
GRMZM2G148930	pink
GRMZM2G138338	midnightblue
GRMZM5G897740	midnightblue
GRMZM5G865319	lightyellow
GRMZM2G089688	blue
GRMZM2G394027	blue
GRMZM2G701585	blue
GRMZM2G161780	purple
GRMZM5G854613	lightgreen
GRMZM2G067675	brown
GRMZM2G074604	darkmagenta
GRMZM2G074414	grey
GRMZM2G049211	blue
GRMZM2G096391	brown
AC207798.2_FG003	darkred
GRMZM2G112240	cyan
GRMZM2G128895	skyblue
GRMZM2G179793	blue
GRMZM2G059958	brown
GRMZM2G380184	grey
GRMZM2G347623	brown
GRMZM2G135526	sienna3
GRMZM2G086497	cyan
GRMZM2G018941	darkred
GRMZM2G009448	lightyellow
GRMZM2G125839	grey
GRMZM2G059799	purple
GRMZM2G072337	lightgreen
GRMZM2G002492	midnightblue
GRMZM2G006047	orange
GRMZM2G142740	brown
GRMZM2G066222	pink
GRMZM2G050875	brown
AC195340.3_FG004	brown
GRMZM2G079417	blue
GRMZM2G002100	brown
GRMZM2G064608	lightyellow
GRMZM2G115939	blue
GRMZM2G015881	blue
GRMZM2G306079	purple
GRMZM2G156174	brown
GRMZM2G177575	blue
GRMZM2G125656	brown
GRMZM2G321053	cyan
GRMZM2G132971	brown
GRMZM2G080930	blue
GRMZM2G136113	brown
GRMZM2G092672	white
GRMZM2G312244	brown
GRMZM2G066801	blue
GRMZM2G061018	brown
GRMZM2G000177	blue
GRMZM2G070693	darkred
GRMZM2G090697	saddlebrown
GRMZM5G816110	cyan
GRMZM2G009353	pink
GRMZM2G013957	purple
GRMZM2G005996	brown
GRMZM2G168506	blue
GRMZM2G480171	brown
GRMZM2G177901	brown
GRMZM2G038922	brown
GRMZM2G317835	skyblue
GRMZM2G158682	orange
GRMZM2G153536	purple
GRMZM2G378665	cyan
GRMZM2G127312	purple
GRMZM2G073888	cyan
GRMZM2G156218	blue
GRMZM2G145709	blue
GRMZM2G453111	midnightblue
GRMZM2G308884	blue
GRMZM2G098569	blue
GRMZM2G062416	lightgreen
GRMZM2G051403	brown
GRMZM2G459391	brown
GRMZM2G070054	brown
GRMZM2G009323	brown
GRMZM2G449817	purple
AC187279.3_FG003	darkmagenta
GRMZM2G060507	blue
GRMZM2G386824	pink
GRMZM2G302160	skyblue
GRMZM5G851266	cyan
GRMZM2G008556	cyan
GRMZM5G837022	darkred
GRMZM2G554653	midnightblue
GRMZM2G458533	blue
GRMZM2G016184	midnightblue
GRMZM2G110851	purple
GRMZM2G142565	blue
GRMZM2G120304	brown
GRMZM2G098857	pink
GRMZM2G060949	brown
GRMZM2G124239	darkturquoise
GRMZM2G310321	steelblue
GRMZM2G701193	lightyellow
GRMZM2G042055	saddlebrown
GRMZM2G115518	brown
GRMZM2G062391	midnightblue
GRMZM2G051720	blue
GRMZM2G342327	lightgreen
GRMZM2G074914	brown
AC206898.3_FG006	brown
GRMZM2G168681	brown
GRMZM5G886006	pink
GRMZM2G040843	grey
GRMZM5G892522	darkolivegreen
GRMZM2G037185	purple
GRMZM2G025227	purple
GRMZM2G037444	brown
GRMZM2G086072	cyan
GRMZM2G150323	lightgreen
GRMZM2G332562	brown
GRMZM2G072156	purple
GRMZM2G035574	lightgreen
GRMZM2G099319	brown
GRMZM2G056373	blue
GRMZM2G039011	darkmagenta
GRMZM2G067707	cyan
GRMZM2G111713	blue
GRMZM2G043396	midnightblue
GRMZM5G846405	brown
GRMZM2G110116	darkred
GRMZM2G380377	darkmagenta
GRMZM2G178571	brown
GRMZM2G135362	cyan
GRMZM5G834697	lightgreen
GRMZM5G865769	pink
GRMZM2G539054	darkred
GRMZM2G377887	brown
GRMZM2G320305	blue
GRMZM5G828945	blue
GRMZM2G366373	orange
GRMZM2G041642	blue
GRMZM2G117012	grey
GRMZM5G814164	skyblue
GRMZM2G164136	pink
GRMZM2G090929	brown
GRMZM2G051683	midnightblue
GRMZM2G035843	cyan
GRMZM2G002851	brown
GRMZM5G822180	orange
GRMZM2G066820	blue
GRMZM5G895435	pink
GRMZM2G119230	blue
GRMZM2G065205	pink
GRMZM2G445905	steelblue
GRMZM2G153445	purple
GRMZM2G117401	cyan
GRMZM2G101130	brown
GRMZM2G009083	midnightblue
GRMZM2G077233	cyan
GRMZM2G463462	brown
GRMZM2G030809	cyan
GRMZM2G001639	purple
GRMZM2G121452	pink
GRMZM2G110616	darkmagenta
GRMZM2G347541	purple
GRMZM2G084279	cyan
GRMZM2G022258	darkturquoise
GRMZM2G034197	darkorange
GRMZM2G169773	blue
AC194341.4_FG004	blue
GRMZM2G006399	blue
GRMZM2G042179	lightgreen
GRMZM2G034876	purple
GRMZM2G116258	blue
GRMZM2G373554	brown
GRMZM2G110063	brown
GRMZM5G815477	saddlebrown
GRMZM2G148924	brown
GRMZM2G130927	blue
GRMZM2G138258	brown
GRMZM2G381933	blue
GRMZM2G175543	cyan
GRMZM2G143357	lightgreen
GRMZM2G008166	saddlebrown
GRMZM2G163067	pink
GRMZM2G121790	cyan
GRMZM2G005633	pink
GRMZM2G479760	midnightblue
GRMZM2G031545	darkred
GRMZM2G111998	midnightblue
GRMZM2G152373	blue
GRMZM2G048276	brown
AC207656.3_FG002	pink
GRMZM2G101711	blue
GRMZM2G018775	brown
GRMZM5G837364	blue
GRMZM2G051921	purple
GRMZM2G148810	cyan
GRMZM2G022269	darkturquoise
GRMZM2G139617	darkturquoise
GRMZM2G136662	pink
GRMZM2G477205	midnightblue
GRMZM2G071034	brown
GRMZM2G107739	brown
GRMZM2G124243	blue
GRMZM5G823318	midnightblue
AC211401.4_FG003	brown
GRMZM2G414848	blue
GRMZM2G075676	lightgreen
GRMZM2G551402	pink
GRMZM2G026939	blue
AC233979.1_FG009	brown
GRMZM2G035477	skyblue
GRMZM2G356142	purple
GRMZM2G055520	darkturquoise
GRMZM5G877929	blue
GRMZM2G301536	lightyellow
GRMZM2G042032	pink
GRMZM2G146192	darkgrey
GRMZM2G153178	cyan
GRMZM2G147560	blue
GRMZM2G135688	lightgreen
GRMZM2G050333	lightgreen
GRMZM2G139349	darkred
GRMZM2G173721	cyan
GRMZM2G161666	orange
GRMZM2G704414	sienna3
AC234185.1_FG004	blue
GRMZM5G889372	brown
GRMZM2G031352	blue
GRMZM2G037015	brown
GRMZM2G148594	blue
GRMZM2G116538	darkolivegreen
GRMZM2G126765	pink
GRMZM2G074053	purple
GRMZM5G893444	lightgreen
GRMZM2G093119	brown
GRMZM2G330526	lightgreen
GRMZM2G316635	midnightblue
GRMZM2G105368	cyan
GRMZM2G128219	pink
GRMZM2G103773	purple
GRMZM2G448715	pink
GRMZM2G450920	brown
GRMZM2G023347	lightyellow
GRMZM2G169013	purple
GRMZM2G150532	blue
GRMZM2G148702	grey
GRMZM2G436084	lightgreen
GRMZM2G177878	grey
GRMZM2G058441	brown
GRMZM2G044733	lightgreen
GRMZM2G015212	cyan
GRMZM2G085670	blue
GRMZM2G046348	darkred
GRMZM5G884325	purple
GRMZM5G873335	cyan
GRMZM2G068519	purple
GRMZM2G083453	darkorange
GRMZM2G176375	orange
GRMZM2G013471	cyan
GRMZM5G872217	brown
AC189795.3_FG001	cyan
GRMZM2G108565	grey
GRMZM2G110408	lightgreen
GRMZM5G829928	cyan
GRMZM2G334142	blue
GRMZM2G058402	brown
GRMZM2G016382	brown
GRMZM5G873681	purple
GRMZM2G019578	purple
GRMZM2G145029	grey
GRMZM2G420772	cyan
GRMZM2G086590	pink
GRMZM2G011636	cyan
GRMZM2G476914	cyan
GRMZM2G075260	brown
GRMZM2G019621	pink
GRMZM2G062761	cyan
AC190909.3_FG004	pink
GRMZM2G326248	brown
GRMZM2G092167	cyan
GRMZM2G041308	midnightblue
GRMZM2G137211	cyan
GRMZM2G160927	brown
GRMZM2G079083	pink
GRMZM2G018006	cyan
GRMZM2G167809	pink
GRMZM2G443668	purple
GRMZM2G348921	lightyellow
GRMZM2G093422	white
GRMZM5G870080	purple
GRMZM2G147288	blue
GRMZM2G170890	brown
GRMZM2G082931	saddlebrown
GRMZM2G083346	lightyellow
GRMZM2G071089	cyan
GRMZM2G001421	brown
GRMZM2G365754	lightgreen
GRMZM2G042870	blue
GRMZM5G821687	grey
GRMZM2G465333	darkred
GRMZM2G082214	purple
AC215244.3_FG002	purple
GRMZM2G042889	blue
GRMZM2G155332	brown
GRMZM2G461777	darkorange
GRMZM2G145008	orange
GRMZM2G076437	cyan
GRMZM2G125032	purple
GRMZM2G312871	paleturquoise
GRMZM2G356423	blue
GRMZM2G169548	pink
GRMZM2G177596	cyan
GRMZM2G440459	grey
GRMZM2G162266	brown
GRMZM5G851617	white
GRMZM2G064096	midnightblue
GRMZM2G021706	darkgrey
GRMZM2G324478	blue
GRMZM2G132623	steelblue
GRMZM2G021433	cyan
GRMZM2G162672	brown
GRMZM2G049041	blue
GRMZM2G169087	brown
GRMZM2G037265	lightgreen
GRMZM2G002993	paleturquoise
GRMZM2G181354	blue
GRMZM2G076985	cyan
GRMZM2G065394	cyan
GRMZM2G463730	brown
GRMZM2G098290	skyblue3
GRMZM2G129150	purple
AC214635.3_FG006	midnightblue
GRMZM2G077068	brown
GRMZM2G009214	darkgrey
GRMZM2G318592	darkgrey
GRMZM2G063188	brown
GRMZM2G082222	blue
GRMZM2G106673	brown
GRMZM2G511451	skyblue3
GRMZM2G149556	pink
GRMZM2G092817	pink
GRMZM2G174427	blue
GRMZM2G374629	brown
GRMZM2G170851	purple
GRMZM2G144483	darkolivegreen
GRMZM2G079625	darkred
GRMZM2G088365	blue
GRMZM2G162154	darkorange
GRMZM2G421829	blue
GRMZM2G086502	white
GRMZM2G029486	lightyellow
GRMZM2G412604	paleturquoise
GRMZM2G403977	brown
GRMZM2G388253	brown
GRMZM2G121066	darkmagenta
GRMZM2G176340	pink
GRMZM2G107985	pink
GRMZM2G012102	skyblue
GRMZM2G119970	skyblue3
GRMZM2G325575	blue
GRMZM2G458650	pink
GRMZM2G115775	cyan
GRMZM2G157202	cyan
GRMZM5G810231	blue
GRMZM2G137593	grey
GRMZM2G050984	purple
GRMZM2G104045	lightgreen
GRMZM2G000710	blue
GRMZM2G160527	blue
GRMZM2G048494	blue
GRMZM2G041527	skyblue
GRMZM2G165290	purple
GRMZM2G034697	purple
GRMZM2G010306	cyan
GRMZM5G860214	orange
GRMZM2G019810	pink
GRMZM2G136624	blue
GRMZM2G165511	purple
GRMZM2G077088	brown
GRMZM2G154059	skyblue3
GRMZM5G803490	midnightblue
GRMZM2G064023	darkolivegreen
GRMZM2G027962	saddlebrown
GRMZM2G042599	blue
GRMZM2G076946	midnightblue
GRMZM2G093574	darkred
GRMZM2G103490	purple
GRMZM5G892973	purple
GRMZM2G135300	blue
GRMZM2G176881	brown
GRMZM2G128358	cyan
GRMZM2G463904	midnightblue
GRMZM2G375762	darkgrey
GRMZM2G062591	lightyellow
GRMZM2G178741	cyan
GRMZM2G124553	blue
GRMZM2G040803	pink
GRMZM2G106412	brown
GRMZM2G098088	purple
GRMZM5G863344	cyan
GRMZM2G066867	brown
GRMZM2G164743	blue
GRMZM2G130230	cyan
GRMZM2G062357	blue
GRMZM2G028501	blue
GRMZM2G090824	blue
GRMZM2G125529	grey
GRMZM2G160556	lightyellow
GRMZM2G065423	midnightblue
GRMZM2G043383	lightyellow
GRMZM2G148404	blue
GRMZM2G174669	blue
GRMZM2G404126	grey
GRMZM2G014729	brown
GRMZM2G059706	pink
GRMZM2G137176	sienna3
GRMZM2G163572	skyblue
AC215201.3_FG008	sienna3
GRMZM2G054634	blue
GRMZM2G310739	blue
GRMZM2G180555	brown
GRMZM2G038667	blue
GRMZM2G141940	lightgreen
GRMZM2G063896	pink
AC189750.4_FG004	grey
GRMZM2G117755	brown
GRMZM2G077420	skyblue
GRMZM2G150925	grey
GRMZM2G036872	blue
GRMZM2G038183	blue
GRMZM2G072091	grey
GRMZM2G109814	blue
GRMZM5G848879	darkgrey
GRMZM5G809292	blue
GRMZM2G122843	brown
GRMZM2G098319	midnightblue
GRMZM2G087063	blue
GRMZM2G431573	midnightblue
GRMZM2G002465	grey
GRMZM5G861603	darkturquoise
GRMZM2G099238	lightgreen
GRMZM5G833578	blue
GRMZM2G091583	brown
GRMZM2G057067	steelblue
GRMZM2G333049	cyan
GRMZM2G101463	darkred
GRMZM2G380015	pink
GRMZM2G058681	blue
GRMZM2G017186	midnightblue
AC206840.3_FG002	brown
GRMZM2G152703	pink
GRMZM2G160237	purple
GRMZM2G005834	purple
GRMZM2G378580	cyan
GRMZM2G181484	cyan
GRMZM5G860498	darkred
GRMZM2G138937	grey
GRMZM2G309950	brown
GRMZM2G154278	darkred
GRMZM2G062452	darkred
GRMZM5G875238	purple
GRMZM2G164352	darkturquoise
GRMZM2G079487	darkred
GRMZM2G161291	blue
GRMZM2G704021	cyan
GRMZM2G177620	blue
GRMZM2G167649	cyan
GRMZM2G481261	purple
GRMZM2G180732	brown
GRMZM2G341747	blue
GRMZM2G035809	lightgreen
GRMZM2G323679	pink
GRMZM2G064302	saddlebrown
GRMZM2G322661	lightgreen
GRMZM5G851965	pink
GRMZM2G102891	darkred
GRMZM2G083081	blue
GRMZM2G049390	steelblue
GRMZM2G457534	blue
GRMZM2G503738	cyan
GRMZM2G432662	pink
GRMZM2G052178	darkred
GRMZM2G102356	purple
GRMZM2G423636	lightgreen
GRMZM2G421791	blue
GRMZM2G365298	pink
GRMZM2G042933	pink
GRMZM2G359397	brown
GRMZM2G416201	darkorange
GRMZM2G063473	lightgreen
GRMZM5G823855	blue
GRMZM2G122357	pink
GRMZM2G000566	cyan
GRMZM2G110295	midnightblue
GRMZM2G081924	grey
GRMZM5G891801	grey
AC196090.3_FG006	blue
GRMZM2G371944	brown
GRMZM2G144088	purple
GRMZM2G125243	pink
GRMZM2G101791	blue
GRMZM2G114503	paleturquoise
GRMZM2G167576	saddlebrown
GRMZM2G178917	sienna3
GRMZM2G078576	purple
GRMZM2G049070	midnightblue
GRMZM2G026452	midnightblue
AC213463.3_FG007	cyan
GRMZM5G814945	brown
GRMZM2G026656	brown
GRMZM5G818760	pink
GRMZM2G024739	blue
GRMZM2G097977	blue
AC202707.3_FG002	lightgreen
GRMZM2G045128	blue
GRMZM2G154221	pink
GRMZM5G887631	darkturquoise
GRMZM5G884466	brown
GRMZM2G153017	blue
GRMZM2G090422	darkred
GRMZM2G174730	cyan
GRMZM2G119359	brown
GRMZM2G006377	cyan
GRMZM2G167728	darkturquoise
GRMZM2G028796	brown
GRMZM2G053980	cyan
GRMZM2G143238	blue
GRMZM2G095511	blue
GRMZM2G100058	purple
GRMZM2G102075	lightyellow
GRMZM2G118951	cyan
GRMZM2G097812	brown
GRMZM2G154595	darkred
GRMZM2G018146	darkred
GRMZM2G009901	midnightblue
GRMZM2G003682	lightgreen
GRMZM2G080816	cyan
GRMZM2G005461	cyan
GRMZM5G895534	cyan
GRMZM2G172101	darkturquoise
GRMZM2G022768	cyan
GRMZM2G059821	brown
GRMZM2G124321	saddlebrown
GRMZM2G324863	brown
GRMZM2G139198	steelblue
GRMZM2G423917	blue
GRMZM2G140443	blue
GRMZM2G342895	pink
GRMZM2G439201	steelblue
GRMZM2G037683	brown
GRMZM2G017805	blue
GRMZM2G059010	pink
GRMZM2G097109	saddlebrown
GRMZM2G313162	brown
GRMZM2G083745	lightgreen
GRMZM2G171179	lightgreen
GRMZM2G110531	saddlebrown
GRMZM2G148485	brown
GRMZM2G387837	brown
GRMZM2G123029	blue
GRMZM2G361535	darkgrey
GRMZM2G096363	blue
GRMZM2G170289	darkgrey
GRMZM2G531230	purple
GRMZM2G081829	lightyellow
GRMZM2G012901	midnightblue
GRMZM5G860632	grey
GRMZM2G074024	brown
GRMZM2G029307	brown
GRMZM2G016671	blue
GRMZM2G470307	pink
GRMZM2G156565	brown
GRMZM2G056986	lightgreen
GRMZM2G365162	cyan
GRMZM2G112951	purple
GRMZM2G336962	brown
GRMZM2G173989	blue
GRMZM2G082007	brown
GRMZM2G145123	saddlebrown
GRMZM2G162460	blue
GRMZM2G156638	cyan
GRMZM2G369340	blue
GRMZM2G156924	blue
GRMZM2G482046	white
GRMZM2G056773	brown
GRMZM2G050512	lightgreen
GRMZM2G153648	darkred
GRMZM2G151979	blue
GRMZM2G028386	purple
GRMZM2G129288	blue
GRMZM2G466545	sienna3
GRMZM2G519210	blue
GRMZM2G136765	brown
GRMZM2G074517	darkred
GRMZM2G042398	blue
GRMZM2G331154	purple
GRMZM2G019501	blue
GRMZM2G097728	cyan
GRMZM2G006069	cyan
GRMZM2G171622	lightgreen
GRMZM2G496991	paleturquoise
GRMZM2G123128	purple
GRMZM2G163396	darkorange
GRMZM2G147243	blue
GRMZM2G127067	blue
GRMZM2G114998	blue
GRMZM5G876146	brown
GRMZM2G127714	lightgreen
GRMZM2G080937	pink
GRMZM2G303728	pink
GRMZM2G132519	darkred
GRMZM2G028054	brown
GRMZM2G173649	blue
GRMZM2G317160	steelblue
GRMZM2G165963	brown
GRMZM2G134430	pink
GRMZM2G092198	darkorange
GRMZM2G412524	lightgreen
GRMZM2G046952	brown
GRMZM2G082940	white
GRMZM2G072658	blue
GRMZM2G129015	darkred
GRMZM2G165778	skyblue
GRMZM2G038964	pink
GRMZM2G021149	darkred
GRMZM2G045331	pink
GRMZM2G106265	blue
GRMZM2G073521	lightgreen
GRMZM2G055464	purple
GRMZM2G142820	pink
GRMZM2G157127	darkorange
GRMZM2G088349	brown
GRMZM2G089010	brown
GRMZM2G703303	pink
GRMZM5G836746	grey
GRMZM2G176912	cyan
GRMZM2G120517	grey
GRMZM2G009804	purple
GRMZM2G181542	darkred
GRMZM2G128518	purple
GRMZM2G123843	pink
GRMZM2G099797	skyblue
GRMZM2G092000	brown
GRMZM5G864239	cyan
GRMZM2G405368	brown
GRMZM2G065076	midnightblue
GRMZM2G113619	pink
GRMZM2G373341	purple
GRMZM2G051247	pink
GRMZM5G878153	darkturquoise
GRMZM2G097502	skyblue
GRMZM2G083716	purple
AC210529.3_FG004	brown
GRMZM2G134062	brown
GRMZM2G077320	purple
GRMZM2G336134	blue
GRMZM2G027972	purple
GRMZM5G818058	blue
GRMZM2G047759	darkorange
GRMZM2G058702	purple
GRMZM2G167138	brown
GRMZM2G043226	orange
GRMZM2G139022	brown
GRMZM2G477872	lightgreen
GRMZM2G308369	darkred
GRMZM2G071304	pink
GRMZM2G140352	lightyellow
GRMZM2G176390	cyan
GRMZM5G890438	purple
GRMZM2G010422	blue
GRMZM5G836910	midnightblue
GRMZM2G028955	pink
GRMZM2G171934	lightgreen
GRMZM2G032336	cyan
GRMZM2G701688	cyan
GRMZM2G145104	purple
GRMZM5G871471	midnightblue
GRMZM2G006370	blue
GRMZM2G027462	blue
GRMZM2G058518	sienna3
GRMZM2G029478	lightgreen
GRMZM2G179885	sienna3
AC208337.2_FG003	blue
GRMZM2G141551	brown
GRMZM2G044442	pink
GRMZM2G118825	cyan
GRMZM5G808017	darkorange
GRMZM2G047152	brown
GRMZM2G031461	blue
GRMZM2G087712	skyblue
GRMZM2G007757	purple
GRMZM2G163406	pink
GRMZM2G004083	cyan
GRMZM2G173315	purple
GRMZM2G113863	cyan
GRMZM5G806771	lightyellow
GRMZM2G085945	purple
GRMZM2G134235	blue
GRMZM2G048392	blue
GRMZM2G124466	lightgreen
GRMZM2G179476	blue
GRMZM2G073700	lightgreen
GRMZM2G136369	darkred
GRMZM2G155709	brown
GRMZM2G144030	lightgreen
GRMZM2G119703	blue
GRMZM2G093557	darkolivegreen
GRMZM2G093096	blue
GRMZM2G142597	brown
GRMZM2G044744	brown
GRMZM2G137569	brown
GRMZM2G108892	cyan
GRMZM5G866843	brown
GRMZM2G012455	grey
GRMZM2G003732	brown
GRMZM2G035849	cyan
GRMZM2G005433	brown
AC195347.4_FG004	lightgreen
GRMZM2G302778	blue
GRMZM2G070305	lightgreen
GRMZM2G139374	brown
GRMZM2G003565	cyan
GRMZM2G159500	cyan
GRMZM2G002858	cyan
GRMZM2G168364	purple
GRMZM2G119650	midnightblue
GRMZM2G303139	cyan
GRMZM2G068128	blue
GRMZM2G040513	purple
GRMZM2G010823	blue
GRMZM2G052658	brown
GRMZM2G081429	blue
GRMZM2G424873	darkturquoise
GRMZM5G896834	pink
AC216353.2_FG005	cyan
GRMZM2G377131	blue
GRMZM5G873459	lightgreen
GRMZM5G836429	pink
GRMZM2G469828	brown
GRMZM2G179976	saddlebrown
GRMZM2G306806	pink
GRMZM2G303752	blue
GRMZM2G180166	brown
GRMZM2G104332	purple
GRMZM2G081363	brown
GRMZM2G003526	purple
GRMZM2G128986	brown
GRMZM2G046583	purple
GRMZM2G120167	blue
GRMZM2G092535	blue
GRMZM2G438007	purple
GRMZM2G153541	darkred
GRMZM2G173483	brown
GRMZM2G080722	blue
GRMZM2G031991	pink
GRMZM2G070716	cyan
GRMZM2G030873	brown
GRMZM2G474092	blue
GRMZM2G030384	purple
GRMZM2G017603	brown
GRMZM2G463227	blue
GRMZM2G004679	pink
GRMZM2G038003	midnightblue
GRMZM2G032706	brown
GRMZM2G060337	skyblue3
GRMZM2G081192	midnightblue
GRMZM2G089655	midnightblue
GRMZM2G393334	purple
GRMZM2G085078	brown
GRMZM2G104542	pink
GRMZM2G449558	blue
GRMZM2G033489	midnightblue
GRMZM2G022958	paleturquoise
GRMZM2G324643	pink
GRMZM2G052509	brown
GRMZM2G007957	brown
GRMZM2G399284	brown
GRMZM2G171373	blue
GRMZM5G821139	pink
GRMZM2G120320	blue
AC194965.4_FG001	lightgreen
GRMZM5G812555	purple
AC205033.4_FG004	lightgreen
GRMZM2G020484	darkorange
GRMZM5G864689	pink
GRMZM2G376957	cyan
GRMZM2G143354	cyan
GRMZM2G140669	midnightblue
GRMZM2G149383	brown
GRMZM2G107774	purple
GRMZM2G147942	brown
GRMZM2G122787	lightgreen
GRMZM2G098153	darkred
GRMZM5G836341	orange
GRMZM2G053764	pink
GRMZM2G093731	purple
GRMZM2G113177	white
GRMZM2G449177	lightgreen
GRMZM2G103182	brown
GRMZM2G355636	blue
GRMZM2G070765	blue
AC190792.2_FG006	purple
GRMZM2G105750	blue
GRMZM5G805685	purple
GRMZM2G163561	skyblue
GRMZM2G159908	paleturquoise
GRMZM2G118005	grey
GRMZM2G409658	blue
GRMZM2G151905	cyan
GRMZM2G051782	brown
GRMZM2G103939	brown
GRMZM5G802566	grey
GRMZM2G419891	lightgreen
GRMZM2G015767	lightgreen
GRMZM2G059073	blue
GRMZM2G085038	brown
GRMZM2G176707	darkred
GRMZM2G458549	brown
GRMZM2G110398	cyan
GRMZM2G386923	blue
GRMZM2G166639	purple
GRMZM2G077256	pink
GRMZM2G118731	lightyellow
GRMZM2G051090	yellowgreen
GRMZM2G064594	brown
GRMZM2G018823	pink
GRMZM2G085600	lightyellow
GRMZM2G062037	purple
GRMZM2G126691	brown
AC191771.3_FG008	cyan
GRMZM2G120329	blue
GRMZM2G040964	purple
GRMZM2G066197	blue
AC155496.2_FG009	darkturquoise
GRMZM2G128663	brown
GRMZM2G113349	paleturquoise
GRMZM2G060993	sienna3
GRMZM2G060255	pink
GRMZM2G318319	cyan
GRMZM2G056772	midnightblue
GRMZM5G830403	blue
GRMZM2G431856	darkorange
GRMZM2G121495	pink
GRMZM2G039948	brown
AC233910.1_FG004	lightgreen
GRMZM2G105598	cyan
AC194974.3_FG005	sienna3
GRMZM2G078667	darkorange
GRMZM2G043119	cyan
AC204712.3_FG002	darkmagenta
GRMZM2G007922	brown
GRMZM2G114634	blue
GRMZM5G803952	darkred
GRMZM2G028136	blue
GRMZM2G133568	brown
GRMZM2G132712	brown
GRMZM2G091595	darkred
GRMZM2G068331	pink
AC193379.3_FG001	brown
GRMZM5G814985	brown
GRMZM2G009995	brown
GRMZM2G080940	cyan
GRMZM2G130678	steelblue
GRMZM2G052403	pink
GRMZM2G113158	blue
GRMZM5G828460	brown
GRMZM2G014303	blue
GRMZM2G031261	blue
GRMZM2G037140	cyan
GRMZM5G898915	darkred
GRMZM2G126106	blue
GRMZM2G082508	purple
GRMZM2G151614	brown
GRMZM2G013790	brown
GRMZM2G095464	purple
GRMZM2G051545	brown
GRMZM2G162145	cyan
GRMZM2G109120	purple
GRMZM2G383883	purple
GRMZM2G058484	blue
GRMZM2G026346	pink
GRMZM2G143854	brown
GRMZM2G071288	purple
AC211164.5_FG004	cyan
GRMZM5G825759	blue
GRMZM2G092663	steelblue
GRMZM2G001956	brown
GRMZM2G140908	pink
GRMZM2G471089	pink
GRMZM2G106766	purple
GRMZM5G880028	brown
GRMZM2G360626	brown
GRMZM2G029184	blue
GRMZM2G359105	brown
GRMZM2G009462	brown
GRMZM5G871463	blue
GRMZM2G147880	darkolivegreen
AC209624.2_FG003	orange
GRMZM2G110913	pink
GRMZM2G056355	blue
GRMZM2G152549	brown
GRMZM2G140612	cyan
GRMZM2G138842	blue
GRMZM2G031001	blue
GRMZM2G130738	sienna3
GRMZM5G893619	pink
GRMZM2G115828	purple
GRMZM2G105330	darkorange
GRMZM2G417089	cyan
GRMZM2G587327	darkturquoise
GRMZM2G005483	pink
GRMZM2G703348	cyan
GRMZM2G004222	brown
GRMZM2G126812	pink
GRMZM2G412899	blue
GRMZM2G145651	pink
GRMZM2G412937	blue
GRMZM2G415470	brown
GRMZM2G087495	purple
GRMZM5G897364	blue
GRMZM2G120047	blue
GRMZM2G008072	white
GRMZM2G059453	brown
GRMZM2G021614	pink
GRMZM2G125777	purple
GRMZM2G135054	brown
GRMZM2G038898	blue
GRMZM2G141152	cyan
GRMZM2G170152	darkgrey
GRMZM5G816545	skyblue3
GRMZM2G163427	lightgreen
GRMZM2G097190	lightyellow
GRMZM2G060952	cyan
GRMZM2G048482	brown
GRMZM5G842148	cyan
GRMZM2G327394	blue
GRMZM2G168228	lightgreen
GRMZM2G109885	lightyellow
GRMZM2G099754	lightgreen
GRMZM2G158811	skyblue
GRMZM2G066362	cyan
GRMZM2G149230	blue
GRMZM2G069928	brown
GRMZM2G057958	blue
GRMZM2G143165	blue
GRMZM5G815353	blue
GRMZM2G061912	pink
GRMZM2G130018	lightyellow
GRMZM2G412207	midnightblue
GRMZM2G030013	grey
GRMZM2G025857	purple
GRMZM2G065244	cyan
GRMZM2G162443	brown
GRMZM2G055699	pink
GRMZM2G020409	blue
GRMZM2G032276	darkmagenta
GRMZM2G063899	lightgreen
GRMZM2G148867	darkred
GRMZM2G103873	darkgrey
GRMZM2G033937	pink
GRMZM2G301405	brown
GRMZM2G091578	pink
GRMZM2G044092	cyan
GRMZM5G892361	cyan
GRMZM2G154532	lightgreen
GRMZM2G122656	darkturquoise
GRMZM2G140867	darkred
GRMZM2G053384	lightgreen
GRMZM2G065498	lightgreen
GRMZM2G414043	pink
GRMZM2G081175	lightgreen
GRMZM2G044908	lightgreen
GRMZM2G110932	blue
GRMZM2G059212	pink
GRMZM2G034313	lightgreen
GRMZM2G127034	brown
GRMZM2G039683	blue
GRMZM2G135410	grey
GRMZM2G362693	pink
GRMZM2G019919	blue
GRMZM2G025248	orange
GRMZM2G459291	lightgreen
GRMZM2G127911	brown
GRMZM2G156145	skyblue
GRMZM2G093195	pink
GRMZM2G090172	darkred
GRMZM2G078360	midnightblue
GRMZM2G051752	pink
GRMZM2G095144	midnightblue
GRMZM2G374309	purple
GRMZM2G139852	darkred
GRMZM2G032160	midnightblue
GRMZM2G315072	paleturquoise
GRMZM2G086287	brown
GRMZM2G148249	brown
GRMZM2G416632	purple
GRMZM2G120173	cyan
GRMZM5G818978	brown
GRMZM2G061695	cyan
GRMZM2G027794	brown
GRMZM2G122284	white
GRMZM2G174917	grey
GRMZM2G166646	pink
GRMZM2G119426	cyan
GRMZM2G057852	pink
GRMZM2G438755	darkolivegreen
GRMZM2G432075	pink
GRMZM2G163054	purple
GRMZM2G113370	white
GRMZM5G888263	white
GRMZM2G040090	brown
GRMZM2G441031	midnightblue
GRMZM2G001079	purple
GRMZM2G119736	lightgreen
GRMZM2G144146	midnightblue
GRMZM2G100067	darkturquoise
GRMZM2G177792	cyan
GRMZM2G058568	cyan
GRMZM2G143917	blue
GRMZM2G118369	lightgreen
GRMZM2G450647	cyan
GRMZM2G025387	cyan
AC213463.3_FG002	darkred
GRMZM2G147158	lightgreen
GRMZM2G176437	white
GRMZM2G027821	midnightblue
GRMZM2G012434	purple
AC149829.2_FG002	brown
GRMZM2G027311	blue
GRMZM2G044128	skyblue
GRMZM2G014705	brown
GRMZM5G871861	blue
GRMZM2G144180	pink
AC231755.1_FG010	orange
GRMZM2G132811	purple
GRMZM2G098819	pink
GRMZM2G074672	saddlebrown
GRMZM2G432566	lightgreen
GRMZM2G318408	grey
GRMZM2G069024	brown
GRMZM2G475168	darkred
GRMZM2G417496	darkorange
GRMZM2G016802	cyan
GRMZM2G013892	blue
GRMZM2G057057	darkturquoise
GRMZM2G085153	darkolivegreen
GRMZM2G135803	purple
GRMZM2G361847	lightgreen
GRMZM2G083580	brown
GRMZM2G306597	purple
GRMZM2G141499	darkred
GRMZM2G152059	midnightblue
GRMZM2G397948	brown
GRMZM2G069208	lightgreen
GRMZM2G046916	brown
GRMZM2G030272	blue
GRMZM2G178972	darkred
GRMZM2G099628	purple
GRMZM2G093705	white
GRMZM2G086937	brown
GRMZM2G396292	blue
GRMZM2G093900	blue
GRMZM2G111300	pink
GRMZM2G101000	midnightblue
GRMZM2G009014	brown
GRMZM2G078299	midnightblue
GRMZM2G461269	purple
AC195860.3_FG005	grey
GRMZM2G361993	grey
GRMZM2G034143	pink
GRMZM2G304638	brown
GRMZM2G317033	grey
GRMZM2G412911	blue
GRMZM2G164965	lightgreen
GRMZM2G032628	lightgreen
GRMZM2G160444	pink
GRMZM2G317426	blue
GRMZM2G065800	blue
GRMZM2G075245	pink
GRMZM2G170336	darkred
GRMZM2G040881	pink
GRMZM5G838671	lightgreen
GRMZM2G057829	purple
GRMZM2G331701	purple
GRMZM2G025014	brown
GRMZM2G145905	purple
GRMZM2G370081	midnightblue
GRMZM2G387381	orange
GRMZM2G476555	darkred
GRMZM2G008710	brown
GRMZM5G803381	brown
GRMZM5G841743	skyblue3
GRMZM2G343688	purple
GRMZM2G158141	darkgrey
GRMZM2G139041	lightgreen
GRMZM2G147685	brown
GRMZM5G878582	darkred
GRMZM2G069018	blue
GRMZM2G156575	blue
GRMZM2G108144	blue
GRMZM2G488465	lightgreen
GRMZM2G093050	skyblue
GRMZM2G082502	brown
GRMZM2G143718	brown
GRMZM2G308193	brown
GRMZM2G413687	brown
GRMZM5G865579	grey
GRMZM2G077036	blue
GRMZM2G479125	cyan
GRMZM2G164113	blue
GRMZM2G171559	blue
GRMZM2G127632	blue
GRMZM2G072088	brown
GRMZM2G394827	darkred
GRMZM2G067176	brown
GRMZM2G417008	blue
GRMZM2G010302	lightgreen
AC205369.3_FG001	purple
GRMZM2G120115	pink
GRMZM2G078832	blue
GRMZM2G467370	cyan
GRMZM2G161491	cyan
AC214817.3_FG004	purple
GRMZM2G017537	blue
GRMZM2G159700	cyan
GRMZM5G864266	blue
GRMZM2G139550	cyan
GRMZM2G436429	blue
GRMZM2G305321	blue
GRMZM2G461356	brown
GRMZM2G005984	skyblue3
GRMZM2G083813	brown
GRMZM2G173759	pink
GRMZM2G376731	darkred
GRMZM2G437445	paleturquoise
AC185501.3_FG006	cyan
GRMZM2G114513	blue
GRMZM2G169182	purple
GRMZM2G473111	brown
GRMZM2G065888	purple
GRMZM2G123122	brown
GRMZM2G122543	brown
GRMZM2G014979	purple
GRMZM5G835721	brown
GRMZM2G022453	brown
GRMZM2G017164	cyan
GRMZM2G075253	midnightblue
GRMZM2G036262	brown
GRMZM2G383937	orange
GRMZM2G157596	cyan
GRMZM2G044512	brown
GRMZM2G092571	blue
GRMZM2G516421	lightgreen
GRMZM2G095333	grey
GRMZM2G065950	darkred
GRMZM2G344936	midnightblue
GRMZM2G013639	blue
GRMZM2G066485	brown
GRMZM2G003769	blue
GRMZM2G161969	cyan
GRMZM2G157990	brown
GRMZM2G109262	purple
GRMZM2G165969	blue
GRMZM2G097289	brown
GRMZM2G475017	brown
GRMZM2G129189	blue
GRMZM2G470984	grey
GRMZM2G001444	blue
GRMZM2G065215	cyan
GRMZM2G452178	purple
GRMZM2G101497	sienna3
GRMZM2G063478	cyan
GRMZM2G046407	lightgreen
GRMZM2G448627	purple
GRMZM2G151237	blue
GRMZM2G097349	cyan
GRMZM2G011858	blue
GRMZM2G156656	blue
GRMZM5G832281	cyan
GRMZM2G022777	blue
GRMZM2G034326	purple
GRMZM2G118022	blue
GRMZM2G159218	brown
GRMZM2G326066	darkred
GRMZM2G074085	steelblue
GRMZM2G017636	pink
GRMZM2G004320	pink
GRMZM5G862355	purple
GRMZM2G157574	steelblue
GRMZM2G099187	lightgreen
GRMZM2G023694	lightgreen
GRMZM2G051771	brown
GRMZM5G898141	blue
GRMZM2G028258	grey
GRMZM2G027632	blue
GRMZM2G379002	cyan
GRMZM2G015861	blue
GRMZM2G479243	lightgreen
GRMZM2G158069	brown
GRMZM2G002115	cyan
GRMZM2G113052	lightgreen
GRMZM2G154029	blue
GRMZM2G057301	brown
GRMZM2G031637	midnightblue
GRMZM2G101480	darkred
GRMZM2G102968	blue
GRMZM2G102499	lightgreen
GRMZM2G319747	darkred
GRMZM2G092749	blue
GRMZM5G850092	pink
GRMZM2G105863	blue
GRMZM2G469111	blue
GRMZM2G135909	cyan
GRMZM2G166658	lightgreen
GRMZM2G445602	blue
GRMZM2G080516	grey
GRMZM2G002130	pink
GRMZM5G888791	blue
GRMZM2G053909	pink
GRMZM2G170509	brown
GRMZM2G144995	brown
GRMZM2G053004	pink
GRMZM2G339994	pink
GRMZM2G150962	midnightblue
GRMZM2G314546	brown
GRMZM2G010505	brown
GRMZM2G366402	brown
GRMZM2G079632	brown
GRMZM2G430600	pink
GRMZM2G151223	lightgreen
GRMZM5G876112	cyan
GRMZM2G180716	blue
GRMZM2G084445	midnightblue
GRMZM2G175089	cyan
GRMZM2G044198	cyan
GRMZM2G136901	lightgreen
GRMZM2G087245	cyan
GRMZM2G022308	lightyellow
GRMZM2G131888	brown
GRMZM2G355773	cyan
GRMZM2G085713	brown
GRMZM2G023387	brown
GRMZM2G019251	blue
GRMZM2G174080	blue
GRMZM2G051619	lightgreen
GRMZM2G023715	darkgrey
GRMZM2G011222	cyan
GRMZM2G041645	darkgrey
GRMZM2G335019	darkred
GRMZM2G026085	lightyellow
GRMZM2G005233	cyan
GRMZM2G054378	brown
GRMZM2G088014	pink
GRMZM2G082670	purple
GRMZM2G040762	blue
GRMZM5G852833	grey
GRMZM2G136700	blue
GRMZM2G083642	steelblue
GRMZM5G844133	saddlebrown
GRMZM2G100505	blue
GRMZM2G024976	brown
GRMZM5G815808	white
GRMZM2G092689	paleturquoise
GRMZM2G361475	pink
GRMZM2G034302	pink
GRMZM2G025236	cyan
GRMZM2G316758	cyan
GRMZM2G153675	darkmagenta
GRMZM2G157269	pink
GRMZM2G014577	pink
GRMZM2G139175	purple
GRMZM2G136635	cyan
GRMZM2G005308	lightyellow
GRMZM5G887389	blue
GRMZM2G301934	brown
GRMZM2G018356	brown
GRMZM2G065612	purple
GRMZM2G004057	darkred
AC233883.1_FG006	saddlebrown
GRMZM2G011708	white
GRMZM2G099088	midnightblue
GRMZM2G042195	grey
GRMZM2G150608	pink
GRMZM2G176630	blue
GRMZM2G158277	pink
GRMZM2G088648	brown
GRMZM2G017525	pink
GRMZM2G025528	blue
GRMZM2G358416	blue
GRMZM2G126586	blue
GRMZM2G028980	brown
GRMZM2G083176	purple
GRMZM2G086123	blue
GRMZM2G060811	pink
GRMZM2G308422	darkmagenta
GRMZM2G119273	midnightblue
GRMZM2G109448	pink
GRMZM2G055621	saddlebrown
GRMZM2G040020	saddlebrown
GRMZM2G410338	grey
GRMZM2G312654	grey
GRMZM2G081158	brown
GRMZM2G146267	blue
GRMZM5G809587	lightgreen
GRMZM2G059151	darkolivegreen
GRMZM2G375222	brown
GRMZM2G106531	lightgreen
GRMZM2G060541	blue
GRMZM2G388778	purple
GRMZM2G329864	lightgreen
GRMZM2G022627	darkmagenta
GRMZM2G152552	darkred
GRMZM2G003108	cyan
GRMZM2G127490	cyan
GRMZM2G074122	blue
GRMZM2G027075	cyan
GRMZM2G091119	brown
GRMZM2G080746	darkturquoise
GRMZM2G083836	darkturquoise
GRMZM2G426154	purple
GRMZM2G080252	midnightblue
GRMZM2G103116	cyan
GRMZM2G070444	pink
GRMZM2G015159	brown
GRMZM2G047021	brown
GRMZM2G171428	brown
GRMZM2G023059	blue
GRMZM2G063688	pink
GRMZM2G055020	pink
GRMZM2G085885	midnightblue
GRMZM5G853392	brown
GRMZM2G027728	steelblue
GRMZM2G022383	brown
GRMZM2G180218	brown
GRMZM2G383807	blue
GRMZM2G043183	blue
GRMZM2G133631	blue
GRMZM2G113917	purple
GRMZM2G407223	purple
GRMZM2G170520	darkgrey
GRMZM2G129448	pink
GRMZM2G037650	brown
GRMZM2G000936	brown
GRMZM2G366077	steelblue
GRMZM2G145152	blue
GRMZM2G150295	brown
GRMZM2G152408	lightgreen
GRMZM2G052586	brown
GRMZM2G326328	pink
GRMZM2G167280	brown
AC234158.1_FG005	lightgreen
GRMZM2G102458	darkolivegreen
GRMZM2G086714	lightgreen
GRMZM2G029113	brown
GRMZM2G050570	purple
GRMZM2G019413	darkorange
GRMZM2G169382	brown
GRMZM2G352132	brown
GRMZM2G067436	purple
GRMZM2G035248	grey
GRMZM2G351599	brown
GRMZM2G124175	lightgreen
GRMZM2G075368	brown
GRMZM2G101958	pink
GRMZM2G060027	brown
GRMZM2G022563	darkturquoise
GRMZM2G117940	white
GRMZM2G021674	blue
GRMZM2G431314	purple
AC217401.3_FG001	pink
GRMZM2G082522	brown
GRMZM2G004475	steelblue
GRMZM2G163251	darkorange
GRMZM2G133756	blue
GRMZM2G111922	purple
GRMZM2G172376	purple
GRMZM2G023020	blue
GRMZM2G420786	purple
GRMZM2G063452	darkorange
GRMZM5G852877	brown
GRMZM2G035665	pink
GRMZM2G169412	blue
GRMZM2G071589	brown
GRMZM2G002754	lightgreen
GRMZM2G069174	lightyellow
GRMZM5G801949	darkorange
GRMZM2G542497	blue
GRMZM2G154987	pink
GRMZM2G004377	lightgreen
GRMZM2G442551	pink
GRMZM2G138255	brown
GRMZM2G082185	blue
GRMZM2G545326	lightgreen
GRMZM2G064145	pink
GRMZM2G436319	blue
GRMZM2G068506	brown
GRMZM2G162702	purple
GRMZM2G398628	pink
GRMZM2G020438	lightyellow
GRMZM2G102601	cyan
GRMZM2G360021	brown
GRMZM2G054468	pink
AC229978.2_FG002	grey
GRMZM2G137479	blue
GRMZM5G867768	lightgreen
GRMZM5G807234	darkred
GRMZM2G094699	blue
GRMZM2G161154	brown
GRMZM2G106133	cyan
GRMZM5G853409	grey
GRMZM2G088114	brown
GRMZM2G008406	white
GRMZM2G020620	lightyellow
GRMZM2G040452	purple
GRMZM2G178294	blue
GRMZM2G043456	darkturquoise
GRMZM2G117971	purple
GRMZM2G181018	blue
GRMZM2G162893	midnightblue
GRMZM2G057075	cyan
GRMZM2G020255	skyblue
AF466202.2_FG008	brown
GRMZM2G003640	cyan
GRMZM2G040207	lightgreen
GRMZM2G041797	lightyellow
GRMZM2G454952	brown
GRMZM2G046861	purple
GRMZM2G465169	cyan
GRMZM2G172369	brown
GRMZM2G102933	purple
GRMZM2G153144	pink
GRMZM2G094090	brown
GRMZM5G893953	blue
GRMZM2G050625	white
GRMZM2G152955	cyan
GRMZM5G857303	grey
GRMZM2G127521	purple
GRMZM5G811428	midnightblue
GRMZM2G073504	blue
GRMZM2G013318	purple
GRMZM2G181030	purple
GRMZM2G015844	purple
GRMZM2G150503	darkgrey
GRMZM5G851207	sienna3
GRMZM2G114057	blue
GRMZM2G063679	pink
GRMZM2G138392	saddlebrown
GRMZM2G051474	purple
GRMZM2G064537	purple
GRMZM2G047161	steelblue
GRMZM2G396231	purple
GRMZM2G364060	cyan
GRMZM2G321010	blue
GRMZM2G064853	lightyellow
GRMZM2G010804	brown
GRMZM2G010017	blue
GRMZM2G061876	lightgreen
GRMZM2G345991	darkred
GRMZM5G878754	pink
GRMZM2G357620	brown
AC233901.1_FG004	purple
GRMZM2G127404	cyan
GRMZM2G402493	cyan
GRMZM2G168957	blue
GRMZM2G366688	pink
GRMZM2G163200	brown
GRMZM2G158103	blue
GRMZM2G172555	blue
GRMZM2G057935	lightgreen
GRMZM2G409372	darkorange
GRMZM2G057329	blue
GRMZM2G001577	pink
GRMZM2G042040	blue
GRMZM2G389948	lightgreen
GRMZM2G162931	blue
GRMZM2G127948	pink
GRMZM2G074489	brown
GRMZM2G409133	blue
GRMZM2G406196	grey
GRMZM2G350357	white
GRMZM2G109547	midnightblue
GRMZM2G016892	pink
GRMZM2G350265	blue
GRMZM2G177005	blue
GRMZM2G050658	steelblue
GRMZM2G104390	lightyellow
GRMZM2G434935	purple
GRMZM2G475536	midnightblue
GRMZM2G148962	brown
GRMZM2G173965	darkgrey
GRMZM2G141922	blue
GRMZM2G081582	brown
GRMZM2G049609	purple
GRMZM2G396402	pink
GRMZM2G007201	darkred
GRMZM5G898740	blue
[truncated: 19,681 more rows]
